# Supplementary material
Source: ML conference proceedings conference paper supplement (https://proceedings.mlr.press/v119/kumar20b.html)
Supplement: Supplementary file [file kumar20b-supp.pdf]

---

# Appendix

## Curse of Dimensionality on Randomized Smoothing for Certifiable Robustness

---

Aounon Kumar<sup>1</sup> Alexander Levine<sup>1</sup> Tom Goldstein<sup>1</sup> Soheil Feizi<sup>1</sup>

### A. Proof for lemma 3

*Proof.* Applying the series expansion of  $e^{tZ}$ , we get,

$$\begin{aligned} E[e^{tZ}] &= \sum_{n=0}^{\infty} \frac{t^n E[Z^n]}{n!} \\ E[Z^n] &= \frac{1}{C} \int_{-\infty}^{\infty} z^n e^{-(|z|/b)^q} dz \\ &= \frac{1}{C} \int_0^{\infty} (1 + (-1)^n) z^n e^{-z^q/b^q} dz \\ &= \begin{cases} 0, & n \text{ is odd} \\ \frac{2}{C} \int_0^{\infty} z^n e^{-z^q/b^q} dz, & n \text{ is even} \end{cases} \end{aligned}$$

When  $n$  is even:

$$\begin{aligned} E[Z^n] &= \frac{2}{C} \int_0^{\infty} z^n e^{-z^q/b^q} dz \\ &= \frac{2b^{n+1} \Gamma\left(\frac{n+1}{q}\right)}{Cq} \end{aligned}$$

Substituting  $C$ ,

$$\begin{aligned} E[Z^n] &= \frac{b^n \Gamma\left(\frac{n+1}{q}\right)}{\Gamma(1/q)} \leq b^n \Gamma(n+1) \quad \text{for } q \geq 1 \\ E[Z^n] &\leq b^n n! \end{aligned}$$

Therefore, keeping only the terms with even  $n$  in the expansion of  $E[e^{tZ}]$ , we get:

$$\begin{aligned} E[e^{tZ}] &\leq \sum_{m=0}^{\infty} (t^2 b^2)^m \\ &= \sum_{m=0}^{\infty} \left( \frac{t^2 \sigma^2 \Gamma(1/q)}{\Gamma(3/q)} \right)^m \quad \text{using } \sigma^2 = \frac{b^2 \Gamma(3/p)}{\Gamma(1/p)} \\ &\leq \sum_{m=0}^{\infty} (c^2 t^2 \sigma^2)^m \end{aligned}$$

---

<sup>1</sup>University of Maryland, College Park, Maryland, USA. Correspondence to: Aounon Kumar <aounon@umd.edu>, Soheil Feizi <sfeizi@cs.umd.edu>.

for some positive constant  $c < 1.85$ , because,

$$\begin{aligned} \frac{\Gamma(1/q)}{\Gamma(3/q)} &= \frac{3q\Gamma(1+1/q)}{q\Gamma(1+3/q)} \quad (\text{using } \Gamma(z+1) = z\Gamma(z)) \\ &= \frac{3\Gamma(1+1/q)}{\Gamma(1+3/q)} \\ &< 1.85^2 \\ &(\text{for } q \geq 1, \Gamma(1+1/q) \leq 1 \text{ and } \Gamma(1+3/q) > 0.88) \end{aligned}$$

□

### B. Proof for lemma 6

*Proof.* The points in  $V_1$  satisfy the following  $2^d$  constraints:

$$\begin{aligned} x_1 + x_2 + \dots + x_d &\leq b \\ -x_1 + x_2 + \dots + x_d &\leq b \\ x_1 - x_2 + \dots + x_d &\leq b \\ -x_1 - x_2 + \dots + x_d &\leq b \\ &\vdots \\ -x_1 - x_2 - \dots - x_d &\leq b \end{aligned}$$

Similarly, points in  $V_2$  satisfy,

$$\begin{aligned} (x_1 - \epsilon) + x_2 + \dots + x_d &\leq b \\ -(x_1 - \epsilon) + x_2 + \dots + x_d &\leq b \\ (x_1 - \epsilon) - x_2 + \dots + x_d &\leq b \\ -(x_1 - \epsilon) - x_2 + \dots + x_d &\leq b \\ &\vdots \\ -(x_1 - \epsilon) - x_2 - \dots - x_d &\leq b \end{aligned}$$

Then, the points in  $V_1 \cap V_2$  must satisfy the following set of constraints constructed by picking constraints that have a + sign for  $x_1$  in the first set of constraints and a - sign for  $x_1$

in the second set.

$$\begin{aligned}
 x_1 + x_2 + \dots + x_d &\leq b \\
 -(x_1 - \epsilon) + x_2 + \dots + x_d &\leq b \\
 x_1 - x_2 + \dots + x_d &\leq b \\
 -(x_1 - \epsilon) - x_2 + \dots + x_d &\leq b \\
 &\vdots \\
 -(x_1 - \epsilon) - x_2 - \dots - x_d &\leq b
 \end{aligned}$$

They may be rewritten as,

$$\begin{aligned}
 (x_1 - \epsilon/2) + x_2 + \dots + x_d &\leq b - \epsilon/2 \\
 -(x_1 - \epsilon/2) + x_2 + \dots + x_d &\leq b - \epsilon/2 \\
 (x_1 - \epsilon/2) - x_2 + \dots + x_d &\leq b - \epsilon/2 \\
 -(x_1 - \epsilon/2) - x_2 + \dots + x_d &\leq b - \epsilon/2 \\
 &\vdots \\
 -(x_1 - \epsilon/2) - x_2 - \dots - x_d &\leq b - \epsilon/2
 \end{aligned}$$

which define an  $\ell_1$  ball of radius  $b - \epsilon/2$  centered at  $(\epsilon/2, 0, \dots, 0)$ , that is,  $\epsilon/2$  in the first coordinate and zero everywhere else.  $\square$

### C. Additional Plots of Certificate Upper Bounds

See Figure 1.

### D. Experimental Details

Our experiments are adapted from the released code for  $\ell_2$  smoothing from (Cohen et al., 2019). In particular, for each Generalized Gaussian distribution with varying parameter  $q$  and standard deviation  $\sigma$ , we trained a ResNet-110 classifier on CIFAR-10 for 90 epochs, with the training under the same noise distribution as used for certification. All training and certification parameters are identical to those used in (Cohen et al., 2019) unless otherwise specified. In particular, all certificates are reported to 99.9% confidence, and we tested using a 500-image subset of the CIFAR-10 test set. For lower-resolution versions of CIFAR-10, we again trained separate models for each resolution used, with the resolution at training time matching the resolution at test time. We first reduced the image resolutions before adding noise, then, once the noise was added, scaled the images back to the original  $32 \times 32$  resolution (by repeating pixel values) before classifying with ResNet-110: this ensured that the number of parameters did not vary between classifiers.

We trained with  $\sigma = 0.12, 0.25, 0.50, 1.00$  for resolutions  $32 \times 32, 16 \times 16$  and  $8 \times 8$ . At higher levels of noise for each scale ( $\sigma = 0.25$  for  $8 \times 8$ ,  $\sigma = 0.5$  for  $8 \times 8$  and  $16 \times 16$ ,  $\sigma = 1.00$  on all scales) the resulting classifiers could not correctly certify the median image ( $p_1(x) < .5$ ), so we do not report any certificates.

Values for ImageNet for the median certificate under Gaussian noise are adapted from the released certificate data from (Cohen et al., 2019).

Curse of Dimensionality on Randomized Smoothing for Certifiable Robustness

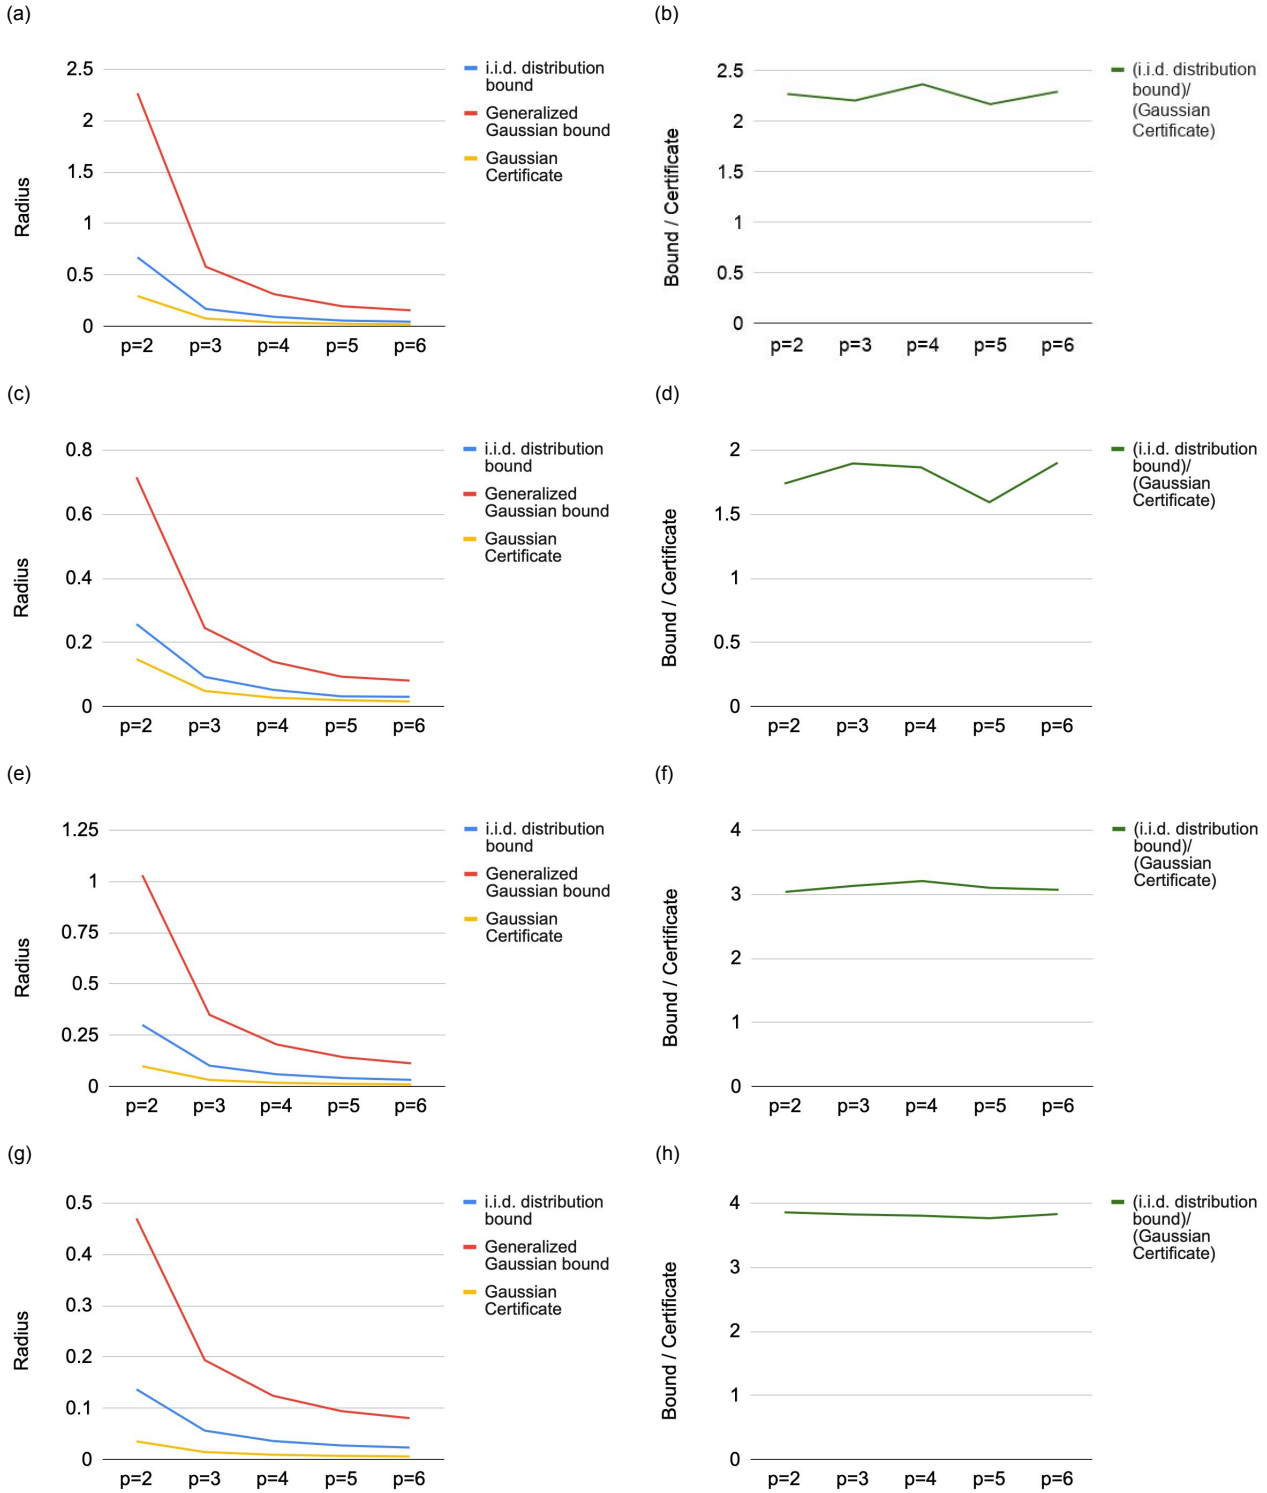

Figure 1. Upper bounds for certifying with Generalized Gaussian noise on CIFAR-10 images, with  $q = p$ , compared with certificates using Gaussian noise directly. Left panels show the certificates and the bounds directly, while right panels show the ratios between the i.i.d. distribution bounds (tighter in each case) and the certificates. Panels (a,b) use unaltered CIFAR-10 images with  $\sigma = 0.5$  noise. Panels (c,d) and (e,f) use CIFAR-10 images at  $16 \times 16$  scale with  $\sigma = 0.12$  and  $\sigma = 0.25$  respectively. Panels (g,h) use CIFAR-10 images at  $8 \times 8$  scale with  $\sigma = 0.12$ .
